# Supplementary material for: Stimulus-dependent relationships between behavioral choice and sensory neural responses
Source: eLife journal article supplement (doi:10.7554/elife.54858), 2021-04-07
Supplement: supp [file elife-54858-supp-v1.zip]

Archive with 4 entries (4 files):
- elife_poa_e54858_Appendix_1_figure_1.pdf
- elife_poa_e54858_Appendix_1_figure_2.pdf
- elife_poa_e54858_Appendix_1_figure_3.pdf
- elife_poa_e54858_Transparent_Reporting_File.pdf
