# Supplementary figures and images for: Stimulus-dependent relationships between behavioral choice and sensory neural responses
Source: eLife journal article supplement (doi:10.7554/elife.54858), 2021-04-07

N° of trials = 50

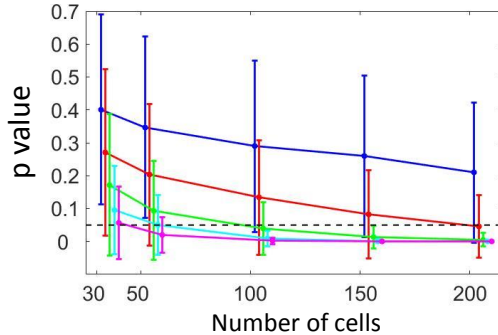

N° of trials = 100

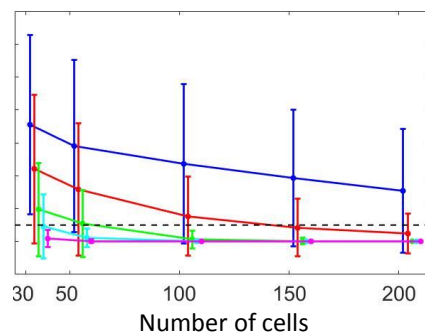

N° of trials = 150

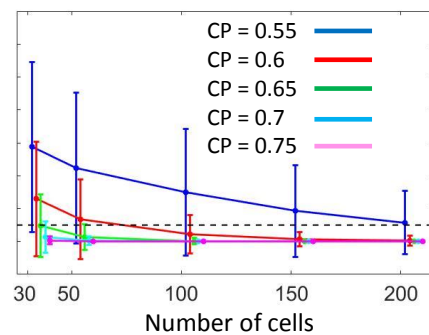

N° of trials = 200

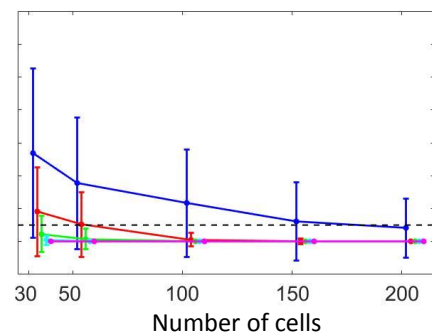

Supplement: supp [file elife-54858-supp-v1.zip › elife_poa_e54858_Appendix_1_figure_1.pdf]

**a**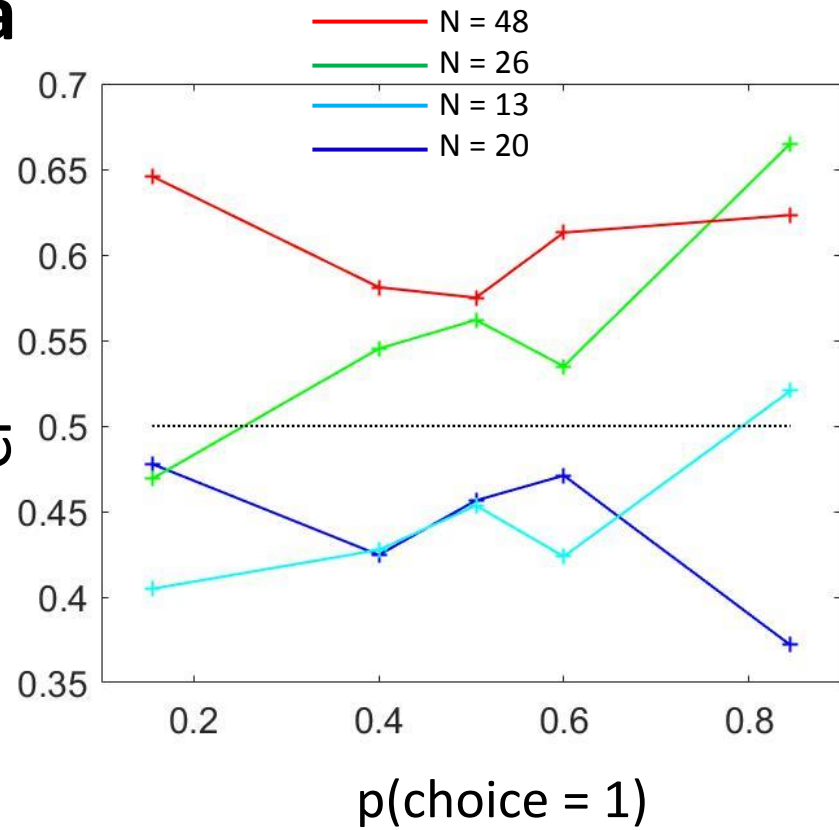**b**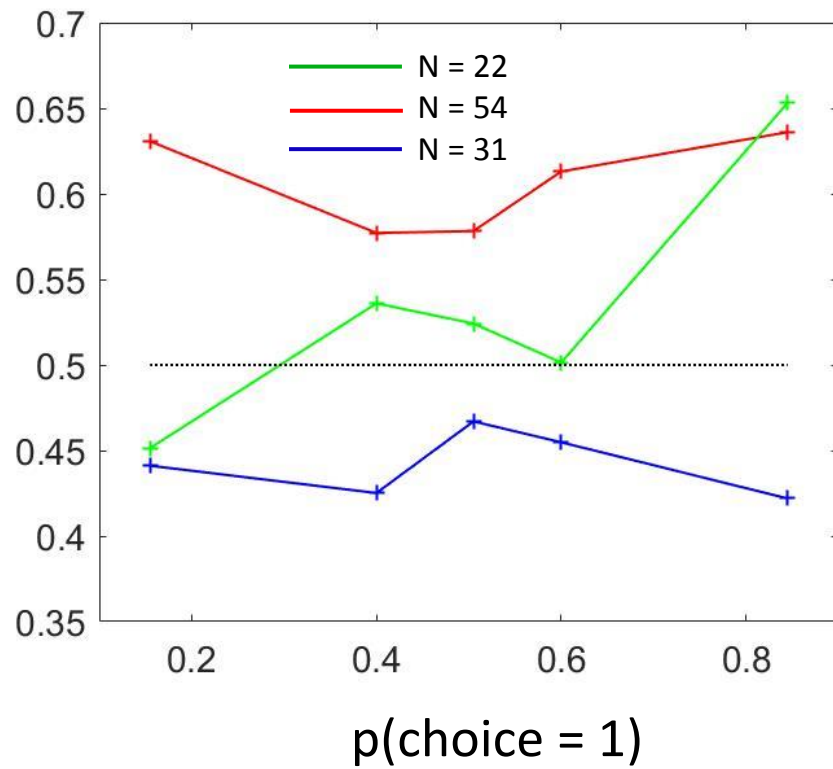**c**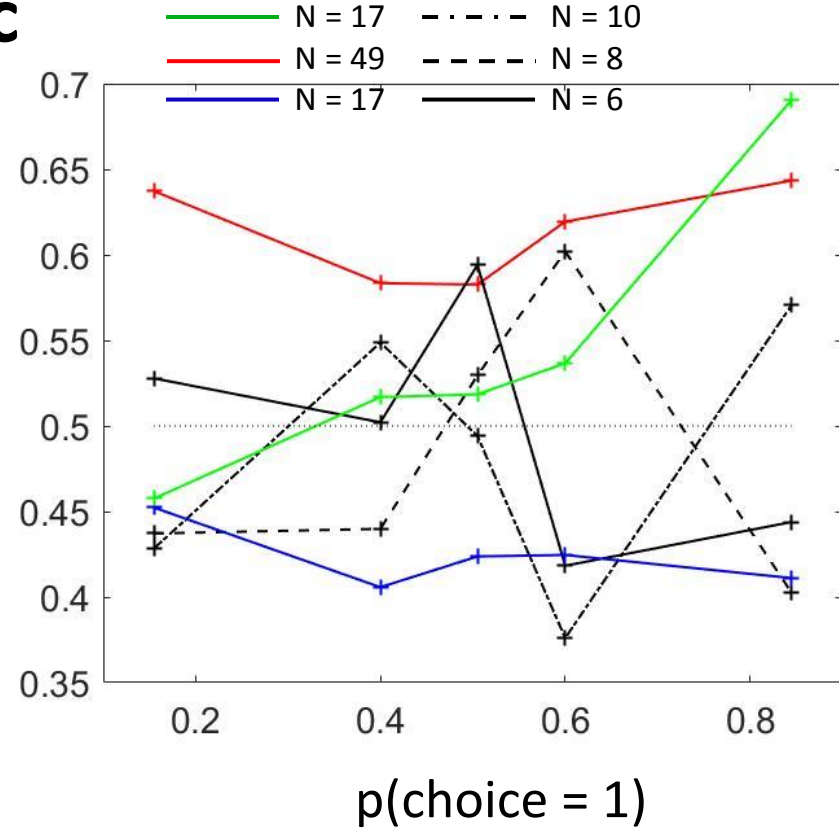

Supplement: supp [file elife-54858-supp-v1.zip › elife_poa_e54858_Appendix_1_figure_2.pdf]

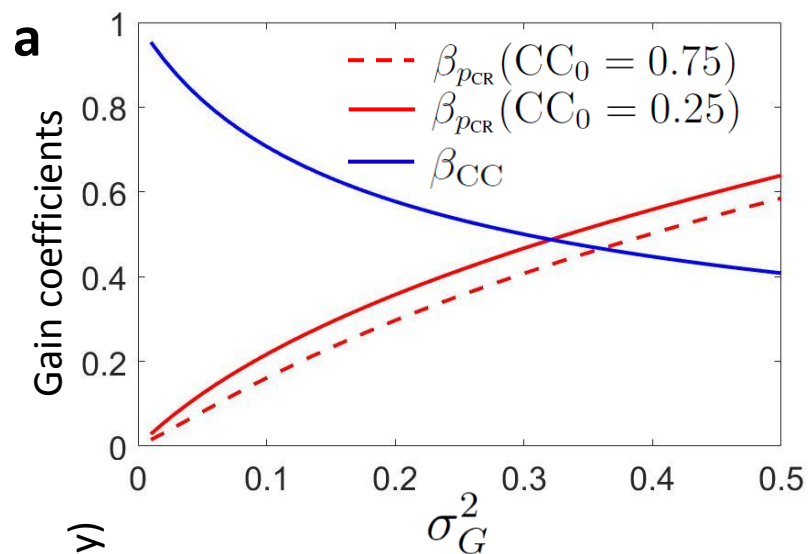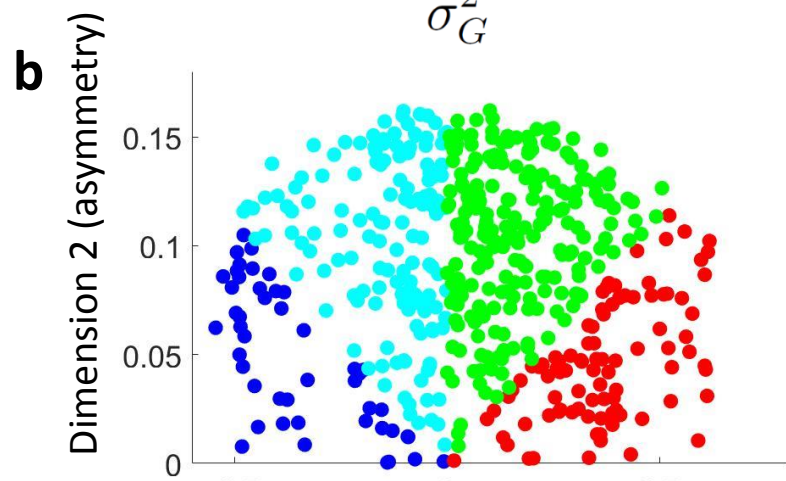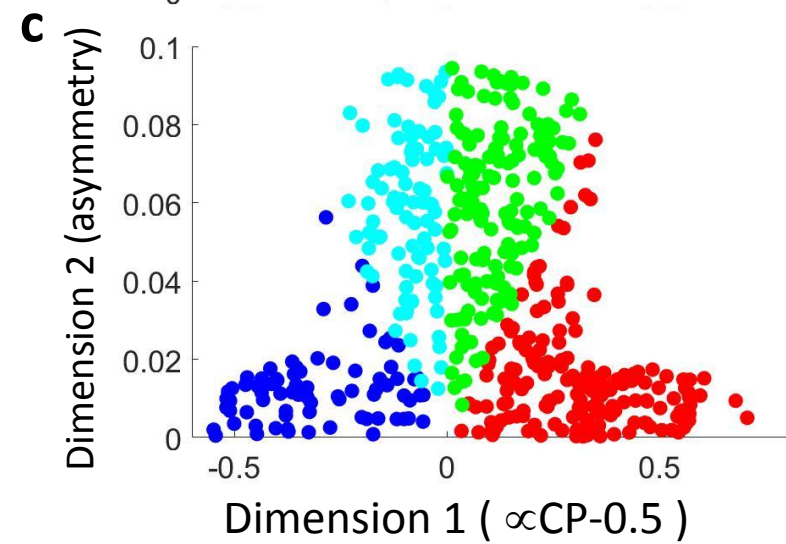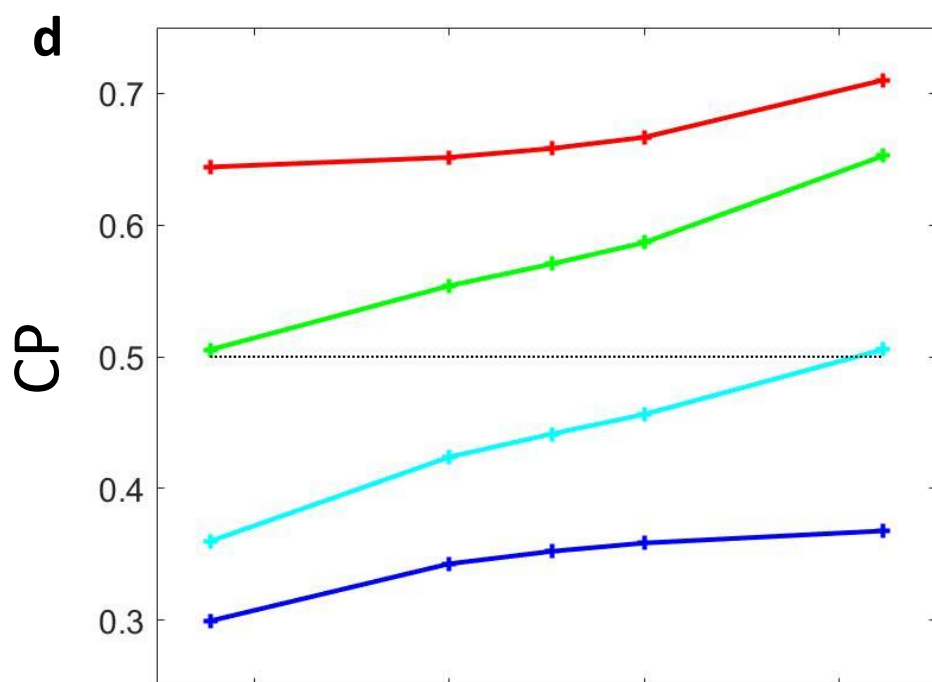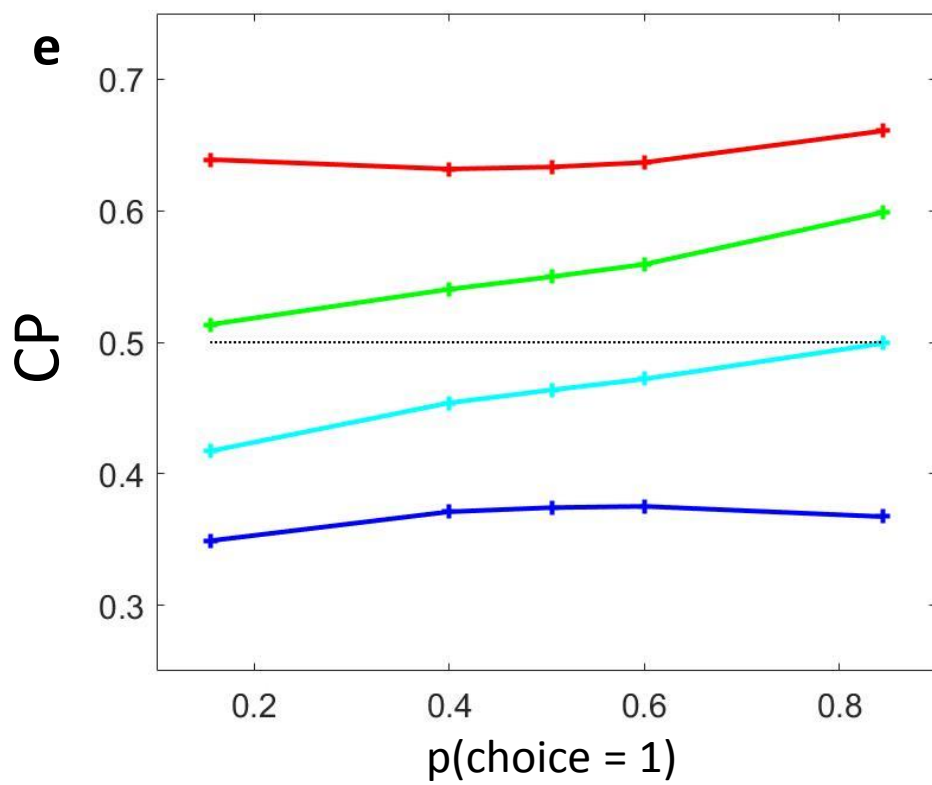

Supplement: supp [file elife-54858-supp-v1.zip › elife_poa_e54858_Appendix_1_figure_3.pdf]
